# Supplementary material
Source: publisher site journal article supplement (https://www.dovepress.com/get_supplementary_file.php?f=275406.docx)
Supplement: Supplementary file 1 [file get_supplementary_file.php]

Table S1: Definition of analyzed vitamins, minerals and trace elements

| Mircronutrient | Variable | Test | Prevalence |
| --- | --- | --- | --- |
| Vitamins | Vitamin D | 1,25-Dihydroxycholecalciferol | 0.37% |
|  |  | 25-Hydroxy-Vitamin-D (25-OH-D) | 20.22% |
|  | Folic acid | Folic acid | 10.15% |
|  |  | Folic acid in erythrocytes | 1.38% |
|  | Homocysteine | Homocysteine | 0.71% |
|  | Methylmalonic acid | Methylmalonic acid | 0.07% |
|  | Holotranscobalamin | Holotranscobolamin | 8.01% |
|  | Vitamin B12/ Cyanocobalamin | Vitamin B12/ Cyanocobalamin | 17.62% |
|  | Other vitamins | Beta-Carotene | 0.03% |
|  |  | Vitamin A (Retinol) | 0.34% |
|  |  | Vitamin B1 | 0.68% |
|  |  | Vitamin B2 | 0.27% |
|  |  | Vitamin B6 | 0.65% |
|  |  | Vitamin C | 0.11% |
|  |  | Vitamin E/ Alpha-Tocopherol | 0.28% |
|  |  | Vitamin PP/ Niacin | 0.07% |
| Minerals | Magnesium | Magnesium in erythrocytes | 0.32% |
|  |  | Magnesium | 3.85% |
|  | Calcium | Calcium, ionized | 0.99% |
|  |  | Calcium, total | 15.38% |
| Trace elements | Iron | Iron | 5.77% |
|  | Ferritin | Ferritin | 26.60% |
|  | Transferrin | Transferrin | 3.50% |
|  | Other trace elements | Cobalt | 0.02% |
|  |  | Manganese | 0.02% |
|  |  | Nickel by Atomic absorption spectroscopy (AAS) | 0.003% |
|  |  | Selenium by AAS | 0.48% |
|  |  | Zinc | 1.56% |
